# Supplementary material for: The Impact of Event Scale – Revised: Examining its cutoff scores among Arab psychiatric patients and healthy adults within the context of COVID-19 as a collective traumatic event
Source: Preprints.org preprint supplement (doi:10.20944/preprints202301.0448.v1), 2023-01-25
Supplement: Supplementary file 1 [file supplementary]

## Sheet: Patient sample
ROC Analysis
Notes
Output Created		25-NOV-2022 05:10:22
Comments
Input	Data	C:\Users\Amira Ali\Desktop\Desktop 2020 1 23\Special issues MDPI\DASS-21 COVID-19 May 2021\MI.sav
	Active Dataset	DataSet6
	Filter	<none>
	Weight	<none>
	Split File	<none>
	N of Rows in Working Data File	168
Missing Value Handling	Definition of Missing	User-defined missing values are treated as missing.
	Cases Used	Only cases with valid data for all analysis variables are used in computing any statistics.
Weight Handling		not applicable
Syntax		ROC ANALYSIS TotIESR BY DASS_8Cate (2) /MISSING USERMISSING=EXCLUDE /CRITERIA CUTOFF=INCLUDE TESTPOS=LARGE DISTRIBUTION=FREE CI=95 /DESIGN PAIR=FALSE /PLOT CURVE=ROC(REFERENCE) MODELQUALITY=TRUE /PRINT SE=TRUE COORDINATES=ROC CLASSIFIER=TRUE.
Resources	Processor Time	00:00:00.77
	Elapsed Time	00:00:00.69
[DataSet6]
Warnings
The test result variable(s): Psychological Trauma has at least one tie between the positive actual state group and the negative actual state group. Statistics may be biased.
Case Processing Summary
DASS_8 Categories 14 as a cutoff	Valid N (listwise)
Positivea	54
Negative	114
Missing	0
Total	168
Larger values of the test result variable(s) indicate stronger evidence for a positive actual state.
a. The positive actual state is 14 and above.
Area Under the ROC Curve
Test Result Variable(s):	Psychological Trauma
Area	Std. Errora	Asymptotic Sig.b	Asymptotic 95% Confidence Interval
			Lower Bound	Upper Bound
0.862736	0.0316919	0	0.800621	0.92485
The test result variable(s): Psychological Trauma has at least one tie between the positive actual state group and the negative actual state group. Statistics may be biased.
a. Under the nonparametric assumption
b. Null hypothesis: true area = 0.5
Classifier Evaluation Metrics
Test Result Variable(s):	Psychological Trauma
Gini Index	K-S Statistics
	Max K-Sa	Cutoffb
0.725471	0.599415	39.5
a. The maximum Kolmogorov-Smirnov (K-S) metric.
b. In case of multiple cutoff values associated with Max K-S, the largest one is reported.
Coordinates of the ROC Curve
Test Result Variable(s):	Psychological Trauma
Positive if Greater Than or Equal Toa	Sensitivity	1 - Specificity
-1	1	1
0.5	0.981481	0.947368
1.5	0.981481	0.938596
2.5	0.981481	0.912281
3.5	0.981481	0.894737
4.5	0.981481	0.877193
5.5	0.981481	0.833333
6.5	0.981481	0.807018
7.5	0.981481	0.77193
9	0.981481	0.745614
10.5	0.981481	0.710526
11.5	0.981481	0.692982
12.5	0.981481	0.675439
13.5	0.962963	0.666667
14.5	0.944444	0.649123
15.5	0.944444	0.631579
16.5	0.944444	0.596491
17.5	0.944444	0.587719
18.5	0.944444	0.578947
19.5	0.925926	0.54386
20.5	0.925926	0.517544
21.5	0.907407	0.482456
22.5	0.907407	0.45614
23.5	0.907407	0.429825
24.5	0.907407	0.421053
25.5	0.907407	0.412281
26.5	0.888889	0.385965
27.5	0.851852	0.368421
28.5	0.851852	0.350877
29.5	0.851852	0.342105
30.5	0.851852	0.27193
31.5	0.833333	0.27193
32.5	0.833333	0.236842
33.5	0.796296	0.210526
34.5	0.759259	0.192982
35.5	0.740741	0.175439
36.5	0.722222	0.157895
37.5	0.722222	0.140351
38.5	0.722222	0.131579
39.5	0.722222	0.122807
40.5	0.685185	0.105263
41.5	0.62963	0.0964912
42.5	0.611111	0.0964912
43.5	0.574074	0.0701754
44.5	0.555556	0.0526316
45.5	0.518519	0.0438596
46.5	0.481481	0.0438596
47.5	0.462963	0.0438596
48.5	0.425926	0.0438596
49.5	0.388889	0.0350877
50.5	0.333333	0.0350877
51.5	0.314815	0.00877193
52.5	0.259259	0.00877193
54	0.185185	0
55.5	0.148148	0
57.5	0.111111	0
62.5	0.0925926	0
67	0.0555556	0
68.5	0.037037	0
76.5	0.0185185	0
85	0	0
The test result variable(s): Psychological Trauma has at least one tie between the positive actual state group and the negative actual state group.
a. The smallest cutoff value is the minimum observed test value minus 1, and the largest cutoff value is the maximum observed test value plus 1. All the other cutoff values are the averages of two consecutive ordered observed test values.
ROC Analysis
Notes
Output Created		25-NOV-2022 05:10:23
Comments
Input	Data	C:\Users\Amira Ali\Desktop\Desktop 2020 1 23\Special issues MDPI\DASS-21 COVID-19 May 2021\MI.sav
	Active Dataset	DataSet6
	Filter	<none>
	Weight	<none>
	Split File	<none>
	N of Rows in Working Data File	168
Missing Value Handling	Definition of Missing	User-defined missing values are treated as missing.
	Cases Used	Only cases with valid data for all analysis variables are used in computing any statistics.
Weight Handling		not applicable
Syntax		ROC ANALYSIS IES_Avoidance BY DASS_8Cate (2) /MISSING USERMISSING=EXCLUDE /CRITERIA CUTOFF=INCLUDE TESTPOS=LARGE DISTRIBUTION=FREE CI=95 /DESIGN PAIR=FALSE /PLOT CURVE=ROC(REFERENCE) MODELQUALITY=TRUE /PRINT SE=TRUE COORDINATES=ROC CLASSIFIER=TRUE.
Resources	Processor Time	00:00:00.97
	Elapsed Time	00:00:00.94
Warnings
The test result variable(s): IES_Avoidance has at least one tie between the positive actual state group and the negative actual state group. Statistics may be biased.
Case Processing Summary
DASS_8 Categories 14 as a cutoff	Valid N (listwise)
Positivea	54
Negative	114
Missing	0
Total	168
Larger values of the test result variable(s) indicate stronger evidence for a positive actual state.
a. The positive actual state is 14 and above.
Area Under the ROC Curve
Test Result Variable(s):	IES_Avoidance
Area	Std. Errora	Asymptotic Sig.b	Asymptotic 95% Confidence Interval
			Lower Bound	Upper Bound
0.702648	0.0423507	1.7099e-06	0.619642	0.785654
The test result variable(s): IES_Avoidance has at least one tie between the positive actual state group and the negative actual state group. Statistics may be biased.
a. Under the nonparametric assumption
b. Null hypothesis: true area = 0.5
Classifier Evaluation Metrics
Test Result Variable(s):	IES_Avoidance
Gini Index	K-S Statistics
	Max K-Sa	Cutoffb
0.405296	0.319688	7.5
a. The maximum Kolmogorov-Smirnov (K-S) metric.
b. In case of multiple cutoff values associated with Max K-S, the largest one is reported.
Coordinates of the ROC Curve
Test Result Variable(s):	IES_Avoidance
Positive if Greater Than or Equal Toa	Sensitivity	1 - Specificity
-1	1	1
0.5	0.962963	0.859649
1.5	0.925926	0.815789
2.5	0.925926	0.745614
3.5	0.925926	0.684211
4.5	0.87037	0.614035
5.5	0.833333	0.570175
6.5	0.796296	0.491228
7.5	0.740741	0.421053
8.5	0.666667	0.368421
9.5	0.592593	0.289474
10.5	0.537037	0.236842
11.5	0.407407	0.192982
12.5	0.351852	0.157895
13.5	0.314815	0.114035
14.5	0.166667	0.0789474
15.5	0.148148	0.0526316
16.5	0.111111	0.0263158
17.5	0.0925926	0.0175439
18.5	0.0740741	0.0175439
19.5	0.037037	0
21	0	0
The test result variable(s): IES_Avoidance has at least one tie between the positive actual state group and the negative actual state group.
a. The smallest cutoff value is the minimum observed test value minus 1, and the largest cutoff value is the maximum observed test value plus 1. All the other cutoff values are the averages of two consecutive ordered observed test values.
ROC Analysis
Notes
Output Created		25-NOV-2022 05:10:24
Comments
Input	Data	C:\Users\Amira Ali\Desktop\Desktop 2020 1 23\Special issues MDPI\DASS-21 COVID-19 May 2021\MI.sav
	Active Dataset	DataSet6
	Filter	<none>
	Weight	<none>
	Split File	<none>
	N of Rows in Working Data File	168
Missing Value Handling	Definition of Missing	User-defined missing values are treated as missing.
	Cases Used	Only cases with valid data for all analysis variables are used in computing any statistics.
Weight Handling		not applicable
Syntax		ROC ANALYSIS IES_Intrusion BY DASS_8Cate (2) /MISSING USERMISSING=EXCLUDE /CRITERIA CUTOFF=INCLUDE TESTPOS=LARGE DISTRIBUTION=FREE CI=95 /DESIGN PAIR=FALSE /PLOT CURVE=ROC(REFERENCE) MODELQUALITY=TRUE /PRINT SE=TRUE COORDINATES=ROC CLASSIFIER=TRUE.
Resources	Processor Time	00:00:01.30
	Elapsed Time	00:00:00.84
Warnings
The test result variable(s): IES_Intrusion has at least one tie between the positive actual state group and the negative actual state group. Statistics may be biased.
Case Processing Summary
DASS_8 Categories 14 as a cutoff	Valid N (listwise)
Positivea	54
Negative	114
Missing	0
Total	168
Larger values of the test result variable(s) indicate stronger evidence for a positive actual state.
a. The positive actual state is 14 and above.
Area Under the ROC Curve
Test Result Variable(s):	IES_Intrusion
Area	Std. Errora	Asymptotic Sig.b	Asymptotic 95% Confidence Interval
			Lower Bound	Upper Bound
0.798652	0.038843	1.4877e-14	0.722521	0.874783
The test result variable(s): IES_Intrusion has at least one tie between the positive actual state group and the negative actual state group. Statistics may be biased.
a. Under the nonparametric assumption
b. Null hypothesis: true area = 0.5
Classifier Evaluation Metrics
Test Result Variable(s):	IES_Intrusion
Gini Index	K-S Statistics
	Max K-Sa	Cutoffb
0.597303	0.502924	6.5
a. The maximum Kolmogorov-Smirnov (K-S) metric.
b. In case of multiple cutoff values associated with Max K-S, the largest one is reported.
Coordinates of the ROC Curve
Test Result Variable(s):	IES_Intrusion
Positive if Greater Than or Equal Toa	Sensitivity	1 - Specificity
-1	1	1
0.5	0.962963	0.780702
1.5	0.925926	0.701754
2.5	0.888889	0.622807
3.5	0.833333	0.570175
4.5	0.833333	0.429825
5.5	0.740741	0.324561
6.5	0.722222	0.219298
7.5	0.648148	0.175439
8.5	0.592593	0.0964912
9.5	0.518519	0.0877193
10.5	0.481481	0.0701754
11.5	0.37037	0.0526316
12.5	0.314815	0.0263158
13.5	0.185185	0.00877193
14.5	0.166667	0
15.5	0.111111	0
16.5	0.0555556	0
17.5	0.037037	0
19	0.0185185	0
21	0	0
The test result variable(s): IES_Intrusion has at least one tie between the positive actual state group and the negative actual state group.
a. The smallest cutoff value is the minimum observed test value minus 1, and the largest cutoff value is the maximum observed test value plus 1. All the other cutoff values are the averages of two consecutive ordered observed test values.
ROC Analysis
Notes
Output Created		25-NOV-2022 05:10:25
Comments
Input	Data	C:\Users\Amira Ali\Desktop\Desktop 2020 1 23\Special issues MDPI\DASS-21 COVID-19 May 2021\MI.sav
	Active Dataset	DataSet6
	Filter	<none>
	Weight	<none>
	Split File	<none>
	N of Rows in Working Data File	168
Missing Value Handling	Definition of Missing	User-defined missing values are treated as missing.
	Cases Used	Only cases with valid data for all analysis variables are used in computing any statistics.
Weight Handling		not applicable
Syntax		ROC ANALYSIS IES_Numbing BY DASS_8Cate (2) /MISSING USERMISSING=EXCLUDE /CRITERIA CUTOFF=INCLUDE TESTPOS=LARGE DISTRIBUTION=FREE CI=95 /DESIGN PAIR=FALSE /PLOT CURVE=ROC(REFERENCE) MODELQUALITY=TRUE /PRINT SE=TRUE COORDINATES=ROC CLASSIFIER=TRUE.
Resources	Processor Time	00:00:00.80
	Elapsed Time	00:00:00.70
Warnings
The test result variable(s): IES_Numbing has at least one tie between the positive actual state group and the negative actual state group. Statistics may be biased.
Case Processing Summary
DASS_8 Categories 14 as a cutoff	Valid N (listwise)
Positivea	54
Negative	114
Missing	0
Total	168
Larger values of the test result variable(s) indicate stronger evidence for a positive actual state.
a. The positive actual state is 14 and above.
Area Under the ROC Curve
Test Result Variable(s):	IES_Numbing
Area	Std. Errora	Asymptotic Sig.b	Asymptotic 95% Confidence Interval
			Lower Bound	Upper Bound
0.690952	0.0438785	1.35002e-05	0.604952	0.776952
The test result variable(s): IES_Numbing has at least one tie between the positive actual state group and the negative actual state group. Statistics may be biased.
a. Under the nonparametric assumption
b. Null hypothesis: true area = 0.5
Classifier Evaluation Metrics
Test Result Variable(s):	IES_Numbing
Gini Index	K-S Statistics
	Max K-Sa	Cutoffb
0.381904	0.309942	5.5
a. The maximum Kolmogorov-Smirnov (K-S) metric.
b. In case of multiple cutoff values associated with Max K-S, the largest one is reported.
Coordinates of the ROC Curve
Test Result Variable(s):	IES_Numbing
Positive if Greater Than or Equal Toa	Sensitivity	1 - Specificity
-1	1	1
0.5	0.944444	0.780702
1.5	0.888889	0.719298
2.5	0.796296	0.596491
3.5	0.722222	0.5
4.5	0.685185	0.394737
5.5	0.555556	0.245614
6.5	0.444444	0.175439
7.5	0.333333	0.105263
8.5	0.185185	0.0789474
9.5	0.12963	0.0526316
10.5	0.0925926	0.0263158
11.5	0.0740741	0.0175439
12.5	0.0740741	0.00877193
13.5	0.0555556	0.00877193
14.5	0.0555556	0
15.5	0.037037	0
17	0	0
The test result variable(s): IES_Numbing has at least one tie between the positive actual state group and the negative actual state group.
a. The smallest cutoff value is the minimum observed test value minus 1, and the largest cutoff value is the maximum observed test value plus 1. All the other cutoff values are the averages of two consecutive ordered observed test values.
ROC Analysis
Notes
Output Created		25-NOV-2022 05:10:26
Comments
Input	Data	C:\Users\Amira Ali\Desktop\Desktop 2020 1 23\Special issues MDPI\DASS-21 COVID-19 May 2021\MI.sav
	Active Dataset	DataSet6
	Filter	<none>
	Weight	<none>
	Split File	<none>
	N of Rows in Working Data File	168
Missing Value Handling	Definition of Missing	User-defined missing values are treated as missing.
	Cases Used	Only cases with valid data for all analysis variables are used in computing any statistics.
Weight Handling		not applicable
Syntax		ROC ANALYSIS IES_Hyperarousal BY DASS_8Cate (2) /MISSING USERMISSING=EXCLUDE /CRITERIA CUTOFF=INCLUDE TESTPOS=LARGE DISTRIBUTION=FREE CI=95 /DESIGN PAIR=FALSE /PLOT CURVE=ROC(REFERENCE) MODELQUALITY=TRUE /PRINT SE=TRUE COORDINATES=ROC CLASSIFIER=TRUE.
Resources	Processor Time	00:00:00.78
	Elapsed Time	00:00:00.72
Warnings
The test result variable(s): IES_Hyperarousal has at least one tie between the positive actual state group and the negative actual state group. Statistics may be biased.
Case Processing Summary
DASS_8 Categories 14 as a cutoff	Valid N (listwise)
Positivea	54
Negative	114
Missing	0
Total	168
Larger values of the test result variable(s) indicate stronger evidence for a positive actual state.
a. The positive actual state is 14 and above.
Area Under the ROC Curve
Test Result Variable(s):	IES_Hyperarousal
Area	Std. Errora	Asymptotic Sig.b	Asymptotic 95% Confidence Interval
			Lower Bound	Upper Bound
0.869802	0.0314818	0	0.808099	0.931505
The test result variable(s): IES_Hyperarousal has at least one tie between the positive actual state group and the negative actual state group. Statistics may be biased.
a. Under the nonparametric assumption
b. Null hypothesis: true area = 0.5
Classifier Evaluation Metrics
Test Result Variable(s):	IES_Hyperarousal
Gini Index	K-S Statistics
	Max K-Sa	Cutoffb
0.739604	0.620858	5.5
a. The maximum Kolmogorov-Smirnov (K-S) metric.
b. In case of multiple cutoff values associated with Max K-S, the largest one is reported.
Coordinates of the ROC Curve
Test Result Variable(s):	IES_Hyperarousal
Positive if Greater Than or Equal Toa	Sensitivity	1 - Specificity
-1	1	1
0.5	0.962963	0.736842
1.5	0.962963	0.657895
2.5	0.925926	0.526316
3.5	0.888889	0.438596
4.5	0.87037	0.289474
5.5	0.796296	0.175439
6.5	0.740741	0.140351
7.5	0.685185	0.105263
8.5	0.555556	0.0614035
9.5	0.425926	0.0350877
10.5	0.333333	0
11.5	0.240741	0
12.5	0.148148	0
13.5	0.0740741	0
15	0.0555556	0
17	0	0
The test result variable(s): IES_Hyperarousal has at least one tie between the positive actual state group and the negative actual state group.
a. The smallest cutoff value is the minimum observed test value minus 1, and the largest cutoff value is the maximum observed test value plus 1. All the other cutoff values are the averages of two consecutive ordered observed test values.
ROC Analysis
Notes
Output Created		25-NOV-2022 05:10:26
Comments
Input	Data	C:\Users\Amira Ali\Desktop\Desktop 2020 1 23\Special issues MDPI\DASS-21 COVID-19 May 2021\MI.sav
	Active Dataset	DataSet6
	Filter	<none>
	Weight	<none>
	Split File	<none>
	N of Rows in Working Data File	168
Missing Value Handling	Definition of Missing	User-defined missing values are treated as missing.
	Cases Used	Only cases with valid data for all analysis variables are used in computing any statistics.
Weight Handling		not applicable
Syntax		ROC ANALYSIS IES_Sleep BY DASS_8Cate (2) /MISSING USERMISSING=EXCLUDE /CRITERIA CUTOFF=INCLUDE TESTPOS=LARGE DISTRIBUTION=FREE CI=95 /DESIGN PAIR=FALSE /PLOT CURVE=ROC(REFERENCE) MODELQUALITY=TRUE /PRINT SE=TRUE COORDINATES=ROC CLASSIFIER=TRUE.
Resources	Processor Time	00:00:00.95
	Elapsed Time	00:00:00.80
Warnings
The test result variable(s): IES_Sleep has at least one tie between the positive actual state group and the negative actual state group. Statistics may be biased.
Case Processing Summary
DASS_8 Categories 14 as a cutoff	Valid N (listwise)
Positivea	54
Negative	114
Missing	0
Total	168
Larger values of the test result variable(s) indicate stronger evidence for a positive actual state.
a. The positive actual state is 14 and above.
Area Under the ROC Curve
Test Result Variable(s):	IES_Sleep
Area	Std. Errora	Asymptotic Sig.b	Asymptotic 95% Confidence Interval
			Lower Bound	Upper Bound
0.810754	0.0359636	0	0.740266	0.881241
The test result variable(s): IES_Sleep has at least one tie between the positive actual state group and the negative actual state group. Statistics may be biased.
a. Under the nonparametric assumption
b. Null hypothesis: true area = 0.5
Classifier Evaluation Metrics
Test Result Variable(s):	IES_Sleep
Gini Index	K-S Statistics
	Max K-Sa	Cutoffb
0.621507	0.530214	3.5
a. The maximum Kolmogorov-Smirnov (K-S) metric.
b. In case of multiple cutoff values associated with Max K-S, the largest one is reported.
Coordinates of the ROC Curve
Test Result Variable(s):	IES_Sleep
Positive if Greater Than or Equal Toa	Sensitivity	1 - Specificity
-1	1	1
0.5	0.925926	0.587719
1.5	0.907407	0.5
2.5	0.814815	0.298246
3.5	0.740741	0.210526
4.5	0.518519	0.131579
5.5	0.351852	0.0701754
6.5	0.185185	0.0175439
7.5	0.0925926	0.0175439
9	0	0
The test result variable(s): IES_Sleep has at least one tie between the positive actual state group and the negative actual state group.
a. The smallest cutoff value is the minimum observed test value minus 1, and the largest cutoff value is the maximum observed test value plus 1. All the other cutoff values are the averages of two consecutive ordered observed test values.
ROC Analysis
Notes
Output Created		25-NOV-2022 05:10:27
Comments
Input	Data	C:\Users\Amira Ali\Desktop\Desktop 2020 1 23\Special issues MDPI\DASS-21 COVID-19 May 2021\MI.sav
	Active Dataset	DataSet6
	Filter	<none>
	Weight	<none>
	Split File	<none>
	N of Rows in Working Data File	168
Missing Value Handling	Definition of Missing	User-defined missing values are treated as missing.
	Cases Used	Only cases with valid data for all analysis variables are used in computing any statistics.
Weight Handling		not applicable
Syntax		ROC ANALYSIS IES_Irritability BY DASS_8Cate (2) /MISSING USERMISSING=EXCLUDE /CRITERIA CUTOFF=INCLUDE TESTPOS=LARGE DISTRIBUTION=FREE CI=95 /DESIGN PAIR=FALSE /PLOT CURVE=ROC(REFERENCE) MODELQUALITY=TRUE /PRINT SE=TRUE COORDINATES=ROC CLASSIFIER=TRUE.
Resources	Processor Time	00:00:00.81
	Elapsed Time	00:00:00.86
Warnings
The test result variable(s): IES_Irritability has at least one tie between the positive actual state group and the negative actual state group. Statistics may be biased.
Case Processing Summary
DASS_8 Categories 14 as a cutoff	Valid N (listwise)
Positivea	54
Negative	114
Missing	0
Total	168
Larger values of the test result variable(s) indicate stronger evidence for a positive actual state.
a. The positive actual state is 14 and above.
Area Under the ROC Curve
Test Result Variable(s):	IES_Irritability
Area	Std. Errora	Asymptotic Sig.b	Asymptotic 95% Confidence Interval
			Lower Bound	Upper Bound
0.825211	0.0331389	0	0.76026	0.890162
The test result variable(s): IES_Irritability has at least one tie between the positive actual state group and the negative actual state group. Statistics may be biased.
a. Under the nonparametric assumption
b. Null hypothesis: true area = 0.5
Classifier Evaluation Metrics
Test Result Variable(s):	IES_Irritability
Gini Index	K-S Statistics
	Max K-Sa	Cutoffb
0.650422	0.498051	1.5
a. The maximum Kolmogorov-Smirnov (K-S) metric.
b. In case of multiple cutoff values associated with Max K-S, the largest one is reported.
Coordinates of the ROC Curve
Test Result Variable(s):	IES_Irritability
Positive if Greater Than or Equal Toa	Sensitivity	1 - Specificity
-1	1	1
0.5	0.962963	0.578947
1.5	0.962963	0.464912
2.5	0.833333	0.377193
3.5	0.740741	0.315789
4.5	0.555556	0.0964912
5.5	0.425926	0.0614035
6.5	0.296296	0.0263158
7.5	0.12963	0.0175439
9	0	0
The test result variable(s): IES_Irritability has at least one tie between the positive actual state group and the negative actual state group.
a. The smallest cutoff value is the minimum observed test value minus 1, and the largest cutoff value is the maximum observed test value plus 1. All the other cutoff values are the averages of two consecutive ordered observed test values.
ROC Analysis
Notes
Output Created		11-DEC-2022 04:16:12
Comments
Input	Data	C:\Users\Amira Ali\Desktop\Desktop 2020 1 23\Special issues MDPI\DASS-21 COVID-19 May 2021\MI.sav
	Active Dataset	DataSet1
	Filter	<none>
	Weight	<none>
	Split File	<none>
	N of Rows in Working Data File	168
Missing Value Handling	Definition of Missing	User-defined missing values are treated as missing.
	Cases Used	Only cases with valid data for all analysis variables are used in computing any statistics.
Weight Handling		not applicable
Syntax		ROC ANALYSIS TotIESR IES_Avoidance IES_Intrusion IES_Numbing IES_Hyperarousal IES_Sleep IES_Irritability BY DASS_8Cate (2) /MISSING USERMISSING=EXCLUDE /CRITERIA CUTOFF=INCLUDE TESTPOS=LARGE DISTRIBUTION=FREE CI=95 /DESIGN PAIR=FALSE /PLOT CURVE=ROC(REFERENCE) MODELQUALITY=TRUE /PRINT SE=TRUE COORDINATES=ROC PR CLASSIFIER=TRUE.
Resources	Processor Time	00:00:01.01
	Elapsed Time	00:00:00.93
Warnings
The test result variable(s): TotIESR, IES_Avoidance, IES_Intrusion, IES_Numbing, IES_Hyperarousal, IES_Sleep, IES_Irritability has at least one tie between the positive actual state group and the negative actual state group. Statistics may be biased.
Case Processing Summary
DASS_8 Categories 14 as a cutoff	Valid N (listwise)
Positivea	54
Negative	114
Missing	0
Total	168
Larger values of the test result variable(s) indicate stronger evidence for a positive actual state.
a. The positive actual state is 14 and above.
Area Under the ROC Curve
Test Result Variable(s)	Area	Std. Errora	Asymptotic Sig.b	Asymptotic 95% Confidence Interval
				Lower Bound	Upper Bound
TotIESR	0.862736	0.0316919	0	0.800621	0.92485
IES_Avoidance	0.702648	0.0423507	1.7099e-06	0.619642	0.785654
IES_Intrusion	0.798652	0.038843	1.4877e-14	0.722521	0.874783
IES_Numbing	0.690952	0.0438785	1.35002e-05	0.604952	0.776952
IES_Hyperarousal	0.869802	0.0314818	0	0.808099	0.931505
IES_Sleep	0.810754	0.0359636	0	0.740266	0.881241
IES_Irritability	0.825211	0.0331389	0	0.76026	0.890162
The test result variable(s): TotIESR, IES_Avoidance, IES_Intrusion, IES_Numbing, IES_Hyperarousal, IES_Sleep, IES_Irritability has at least one tie between the positive actual state group and the negative actual state group. Statistics may be biased.
a. Under the nonparametric assumption
b. Null hypothesis: true area = 0.5
Classifier Evaluation Metrics
Test Result Variable(s)	Gini Index	K-S Statistics
		Max K-Sa	Cutoffb
TotIESR	0.725471	0.599415	39.5
IES_Avoidance	0.405296	0.319688	7.5
IES_Intrusion	0.597303	0.502924	6.5
IES_Numbing	0.381904	0.309942	5.5
IES_Hyperarousal	0.739604	0.620858	5.5
IES_Sleep	0.621507	0.530214	3.5
IES_Irritability	0.650422	0.498051	1.5
a. The maximum Kolmogorov-Smirnov (K-S) metric.
b. In case of multiple cutoff values associated with Max K-S, the largest one is reported.
Coordinates of the ROC Curve
Test Result Variable(s)	Positive if Greater Than or Equal Toa	Sensitivity	1 - Specificity
TotIESR	-1	1	1
	0.5	0.981481	0.947368
	1.5	0.981481	0.938596
	2.5	0.981481	0.912281
	3.5	0.981481	0.894737
	4.5	0.981481	0.877193
	5.5	0.981481	0.833333
	6.5	0.981481	0.807018
	7.5	0.981481	0.77193
	9	0.981481	0.745614
	10.5	0.981481	0.710526
	11.5	0.981481	0.692982
	12.5	0.981481	0.675439
	13.5	0.962963	0.666667
	14.5	0.944444	0.649123
	15.5	0.944444	0.631579
	16.5	0.944444	0.596491
	17.5	0.944444	0.587719
	18.5	0.944444	0.578947
	19.5	0.925926	0.54386
	20.5	0.925926	0.517544
	21.5	0.907407	0.482456
	22.5	0.907407	0.45614
	23.5	0.907407	0.429825
	24.5	0.907407	0.421053
	25.5	0.907407	0.412281
	26.5	0.888889	0.385965
	27.5	0.851852	0.368421
	28.5	0.851852	0.350877
	29.5	0.851852	0.342105
	30.5	0.851852	0.27193
	31.5	0.833333	0.27193
	32.5	0.833333	0.236842
	33.5	0.796296	0.210526
	34.5	0.759259	0.192982
	35.5	0.740741	0.175439
	36.5	0.722222	0.157895
	37.5	0.722222	0.140351
	38.5	0.722222	0.131579
	39.5	0.722222	0.122807
	40.5	0.685185	0.105263
	41.5	0.62963	0.0964912
	42.5	0.611111	0.0964912
	43.5	0.574074	0.0701754
	44.5	0.555556	0.0526316
	45.5	0.518519	0.0438596
	46.5	0.481481	0.0438596
	47.5	0.462963	0.0438596
	48.5	0.425926	0.0438596
	49.5	0.388889	0.0350877
	50.5	0.333333	0.0350877
	51.5	0.314815	0.00877193
	52.5	0.259259	0.00877193
	54	0.185185	0
	55.5	0.148148	0
	57.5	0.111111	0
	62.5	0.0925926	0
	67	0.0555556	0
	68.5	0.037037	0
	76.5	0.0185185	0
	85	0	0
IES_Avoidance	-1	1	1
	0.5	0.962963	0.859649
	1.5	0.925926	0.815789
	2.5	0.925926	0.745614
	3.5	0.925926	0.684211
	4.5	0.87037	0.614035
	5.5	0.833333	0.570175
	6.5	0.796296	0.491228
	7.5	0.740741	0.421053
	8.5	0.666667	0.368421
	9.5	0.592593	0.289474
	10.5	0.537037	0.236842
	11.5	0.407407	0.192982
	12.5	0.351852	0.157895
	13.5	0.314815	0.114035
	14.5	0.166667	0.0789474
	15.5	0.148148	0.0526316
	16.5	0.111111	0.0263158
	17.5	0.0925926	0.0175439
	18.5	0.0740741	0.0175439
	19.5	0.037037	0
	21	0	0
IES_Intrusion	-1	1	1
	0.5	0.962963	0.780702
	1.5	0.925926	0.701754
	2.5	0.888889	0.622807
	3.5	0.833333	0.570175
	4.5	0.833333	0.429825
	5.5	0.740741	0.324561
	6.5	0.722222	0.219298
	7.5	0.648148	0.175439
	8.5	0.592593	0.0964912
	9.5	0.518519	0.0877193
	10.5	0.481481	0.0701754
	11.5	0.37037	0.0526316
	12.5	0.314815	0.0263158
	13.5	0.185185	0.00877193
	14.5	0.166667	0
	15.5	0.111111	0
	16.5	0.0555556	0
	17.5	0.037037	0
	19	0.0185185	0
	21	0	0
IES_Numbing	-1	1	1
	0.5	0.944444	0.780702
	1.5	0.888889	0.719298
	2.5	0.796296	0.596491
	3.5	0.722222	0.5
	4.5	0.685185	0.394737
	5.5	0.555556	0.245614
	6.5	0.444444	0.175439
	7.5	0.333333	0.105263
	8.5	0.185185	0.0789474
	9.5	0.12963	0.0526316
	10.5	0.0925926	0.0263158
	11.5	0.0740741	0.0175439
	12.5	0.0740741	0.00877193
	13.5	0.0555556	0.00877193
	14.5	0.0555556	0
	15.5	0.037037	0
	17	0	0
IES_Hyperarousal	-1	1	1
	0.5	0.962963	0.736842
	1.5	0.962963	0.657895
	2.5	0.925926	0.526316
	3.5	0.888889	0.438596
	4.5	0.87037	0.289474
	5.5	0.796296	0.175439
	6.5	0.740741	0.140351
	7.5	0.685185	0.105263
	8.5	0.555556	0.0614035
	9.5	0.425926	0.0350877
	10.5	0.333333	0
	11.5	0.240741	0
	12.5	0.148148	0
	13.5	0.0740741	0
	15	0.0555556	0
	17	0	0
IES_Sleep	-1	1	1
	0.5	0.925926	0.587719
	1.5	0.907407	0.5
	2.5	0.814815	0.298246
	3.5	0.740741	0.210526
	4.5	0.518519	0.131579
	5.5	0.351852	0.0701754
	6.5	0.185185	0.0175439
	7.5	0.0925926	0.0175439
	9	0	0
IES_Irritability	-1	1	1
	0.5	0.962963	0.578947
	1.5	0.962963	0.464912
	2.5	0.833333	0.377193
	3.5	0.740741	0.315789
	4.5	0.555556	0.0964912
	5.5	0.425926	0.0614035
	6.5	0.296296	0.0263158
	7.5	0.12963	0.0175439
	9	0	0
The test result variable(s): TotIESR, IES_Avoidance, IES_Intrusion, IES_Numbing, IES_Hyperarousal, IES_Sleep, IES_Irritability has at least one tie between the positive actual state group and the negative actual state group.
a. The smallest cutoff value is the minimum observed test value minus 1, and the largest cutoff value is the maximum observed test value plus 1. All the other cutoff values are the averages of two consecutive ordered observed test values.
Coordinates of the Precision-Recall Curve
Test Result Variable(s)	Positive if Greater Than or Equal Toa	Precision	Recall
TotIESR	-1	0.321429	1
	0.5	0.329193	0.981481
	1.5	0.33125	0.981481
	2.5	0.33758	0.981481
	3.5	0.341935	0.981481
	4.5	0.346405	0.981481
	5.5	0.358108	0.981481
	6.5	0.365517	0.981481
	7.5	0.375887	0.981481
	9	0.384058	0.981481
	10.5	0.395522	0.981481
	11.5	0.401515	0.981481
	12.5	0.407692	0.981481
	13.5	0.40625	0.962963
	14.5	0.408	0.944444
	15.5	0.414634	0.944444
	16.5	0.428571	0.944444
	17.5	0.432203	0.944444
	18.5	0.435897	0.944444
	19.5	0.446429	0.925926
	20.5	0.458716	0.925926
	21.5	0.471154	0.907407
	22.5	0.485149	0.907407
	23.5	0.5	0.907407
	24.5	0.505155	0.907407
	25.5	0.510417	0.907407
	26.5	0.521739	0.888889
	27.5	0.522727	0.851852
	28.5	0.534884	0.851852
	29.5	0.541176	0.851852
	30.5	0.597403	0.851852
	31.5	0.592105	0.833333
	32.5	0.625	0.833333
	33.5	0.641791	0.796296
	34.5	0.650794	0.759259
	35.5	0.666667	0.740741
	36.5	0.684211	0.722222
	37.5	0.709091	0.722222
	38.5	0.722222	0.722222
	39.5	0.735849	0.722222
	40.5	0.755102	0.685185
	41.5	0.755556	0.62963
	42.5	0.75	0.611111
	43.5	0.794872	0.574074
	44.5	0.833333	0.555556
	45.5	0.848485	0.518519
	46.5	0.83871	0.481481
	47.5	0.833333	0.462963
	48.5	0.821429	0.425926
	49.5	0.84	0.388889
	50.5	0.818182	0.333333
	51.5	0.944444	0.314815
	52.5	0.933333	0.259259
	54	1	0.185185
	55.5	1	0.148148
	57.5	1	0.111111
	62.5	1	0.0925926
	67	1	0.0555556
	68.5	1	0.037037
	76.5	1	0.0185185
	85	1	0
IES_Avoidance	-1	0.321429	1
	0.5	0.346667	0.962963
	1.5	0.34965	0.925926
	2.5	0.37037	0.925926
	3.5	0.390625	0.925926
	4.5	0.401709	0.87037
	5.5	0.409091	0.833333
	6.5	0.434343	0.796296
	7.5	0.454545	0.740741
	8.5	0.461538	0.666667
	9.5	0.492308	0.592593
	10.5	0.517857	0.537037
	11.5	0.5	0.407407
	12.5	0.513514	0.351852
	13.5	0.566667	0.314815
	14.5	0.5	0.166667
	15.5	0.571429	0.148148
	16.5	0.666667	0.111111
	17.5	0.714286	0.0925926
	18.5	0.666667	0.0740741
	19.5	1	0.037037
	21	1	0
IES_Intrusion	-1	0.321429	1
	0.5	0.368794	0.962963
	1.5	0.384615	0.925926
	2.5	0.403361	0.888889
	3.5	0.409091	0.833333
	4.5	0.478723	0.833333
	5.5	0.519481	0.740741
	6.5	0.609375	0.722222
	7.5	0.636364	0.648148
	8.5	0.744186	0.592593
	9.5	0.736842	0.518519
	10.5	0.764706	0.481481
	11.5	0.769231	0.37037
	12.5	0.85	0.314815
	13.5	0.909091	0.185185
	14.5	1	0.166667
	15.5	1	0.111111
	16.5	1	0.0555556
	17.5	1	0.037037
	19	1	0.0185185
	21	1	0
IES_Numbing	-1	0.321429	1
	0.5	0.364286	0.944444
	1.5	0.369231	0.888889
	2.5	0.387387	0.796296
	3.5	0.40625	0.722222
	4.5	0.45122	0.685185
	5.5	0.517241	0.555556
	6.5	0.545455	0.444444
	7.5	0.6	0.333333
	8.5	0.526316	0.185185
	9.5	0.538462	0.12963
	10.5	0.625	0.0925926
	11.5	0.666667	0.0740741
	12.5	0.8	0.0740741
	13.5	0.75	0.0555556
	14.5	1	0.0555556
	15.5	1	0.037037
	17	1	0
IES_Hyperarousal	-1	0.321429	1
	0.5	0.382353	0.962963
	1.5	0.409449	0.962963
	2.5	0.454545	0.925926
	3.5	0.489796	0.888889
	4.5	0.5875	0.87037
	5.5	0.68254	0.796296
	6.5	0.714286	0.740741
	7.5	0.755102	0.685185
	8.5	0.810811	0.555556
	9.5	0.851852	0.425926
	10.5	1	0.333333
	11.5	1	0.240741
	12.5	1	0.148148
	13.5	1	0.0740741
	15	1	0.0555556
	17	1	0
IES_Sleep	-1	0.321429	1
	0.5	0.42735	0.925926
	1.5	0.462264	0.907407
	2.5	0.564103	0.814815
	3.5	0.625	0.740741
	4.5	0.651163	0.518519
	5.5	0.703704	0.351852
	6.5	0.833333	0.185185
	7.5	0.714286	0.0925926
	9	0.714286	0
IES_Irritability	-1	0.321429	1
	0.5	0.440678	0.962963
	1.5	0.495238	0.962963
	2.5	0.511364	0.833333
	3.5	0.526316	0.740741
	4.5	0.731707	0.555556
	5.5	0.766667	0.425926
	6.5	0.842105	0.296296
	7.5	0.777778	0.12963
	9	0.777778	0
The test result variable(s): TotIESR, IES_Avoidance, IES_Intrusion, IES_Numbing, IES_Hyperarousal, IES_Sleep, IES_Irritability has at least one tie between the positive actual state group and the negative actual state group.
a. The smallest cutoff value is the minimum observed test value minus 1, and the largest cutoff value is the maximum observed test value plus 1. All the other cutoff values are the averages of two consecutive ordered observed test values.

## Sheet: Healthy adultsROC Analysis
ROC Analysis
Notes
Output Created		25-NOV-2022 04:59:26
Comments
Input	Data	C:\Users\Amira Ali\Desktop\Desktop 2020 1 23\Special issues MDPI\DASS-21 COVID-19 May 2021\Community.sav
	Active Dataset	DataSet7
	Filter	<none>
	Weight	<none>
	Split File	<none>
	N of Rows in Working Data File	992
Missing Value Handling	Definition of Missing	User-defined missing values are treated as missing.
	Cases Used	Only cases with valid data for all analysis variables are used in computing any statistics.
Weight Handling		not applicable
Syntax		ROC ANALYSIS TotIESR BY DASS_8Cate (2) /MISSING USERMISSING=EXCLUDE /CRITERIA CUTOFF=INCLUDE TESTPOS=LARGE DISTRIBUTION=FREE CI=95 /DESIGN PAIR=FALSE /PLOT CURVE=ROC(REFERENCE) MODELQUALITY=TRUE /PRINT SE=TRUE COORDINATES=ROC CLASSIFIER=TRUE.
Resources	Processor Time	00:00:05.59
	Elapsed Time	00:00:16.85
[DataSet7] C:\Users\Amira Ali\Desktop\Desktop 2020 1 23\Special issues MDPI\DASS-21 COVID-19 May 2021\Community.sav
Warnings
The test result variable(s): TotIESR has at least one tie between the positive actual state group and the negative actual state group. Statistics may be biased.
Case Processing Summary
DASS_8 Categories 14 as a cutoff	Valid N (listwise)
Positivea	92
Negative	900
Missing	0
Total	992
Larger values of the test result variable(s) indicate stronger evidence for a positive actual state.
a. The positive actual state is 14 and above.
Area Under the ROC Curve
Test Result Variable(s):	TotIESR
Area	Std. Errora	Asymptotic Sig.b	Asymptotic 95% Confidence Interval
			Lower Bound	Upper Bound
0.905707	0.0177119	0	0.870992	0.940421
The test result variable(s): TotIESR has at least one tie between the positive actual state group and the negative actual state group. Statistics may be biased.
a. Under the nonparametric assumption
b. Null hypothesis: true area = 0.5
Classifier Evaluation Metrics
Test Result Variable(s):	TotIESR
Gini Index	K-S Statistics
	Max K-Sa	Cutoffb
0.811413	0.699565	30.5
a. The maximum Kolmogorov-Smirnov (K-S) metric.
b. In case of multiple cutoff values associated with Max K-S, the largest one is reported.
Coordinates of the ROC Curve
Test Result Variable(s):	TotIESR
Positive if Greater Than or Equal Toa	Sensitivity	1 - Specificity
-1	1	1
0.5	1	0.896667
1.5	1	0.874444
2.5	1	0.836667
3.5	1	0.806667
4.5	1	0.787778
5.5	1	0.771111
6.5	0.98913	0.745556
7.5	0.98913	0.72
8.5	0.978261	0.687778
9.5	0.978261	0.664444
10.5	0.978261	0.631111
11.5	0.978261	0.613333
12.5	0.967391	0.591111
13.5	0.956522	0.562222
14.5	0.945652	0.536667
15.5	0.945652	0.52
16.5	0.945652	0.492222
17.5	0.934783	0.458889
18.5	0.923913	0.438889
19.5	0.902174	0.416667
20.5	0.902174	0.394444
21.5	0.902174	0.366667
22.5	0.902174	0.347778
23.5	0.902174	0.317778
24.5	0.902174	0.287778
25.5	0.891304	0.26
26.5	0.891304	0.238889
27.5	0.880435	0.217778
28.5	0.880435	0.198889
29.5	0.880435	0.185556
30.5	0.869565	0.17
31.5	0.826087	0.155556
32.5	0.815217	0.141111
33.5	0.793478	0.13
34.5	0.782609	0.115556
35.5	0.771739	0.1
36.5	0.73913	0.0922222
37.5	0.717391	0.08
38.5	0.673913	0.0633333
39.5	0.619565	0.0566667
40.5	0.586957	0.05
41.5	0.554348	0.04
42.5	0.532609	0.0333333
43.5	0.51087	0.0244444
44.5	0.456522	0.02
45.5	0.423913	0.0122222
46.5	0.402174	0.00777778
47.5	0.347826	0.00555556
48.5	0.326087	0.00444444
49.5	0.326087	0.00333333
50.5	0.282609	0.00333333
51.5	0.25	0.00333333
52.5	0.23913	0.00111111
53.5	0.206522	0
54.5	0.173913	0
55.5	0.163043	0
56.5	0.152174	0
58	0.141304	0
60	0.108696	0
61.5	0.0978261	0
62.5	0.076087	0
63.5	0.0543478	0
65	0.0326087	0
66.5	0.0217391	0
70.5	0.0108696	0
75	0	0
The test result variable(s): TotIESR has at least one tie between the positive actual state group and the negative actual state group.
a. The smallest cutoff value is the minimum observed test value minus 1, and the largest cutoff value is the maximum observed test value plus 1. All the other cutoff values are the averages of two consecutive ordered observed test values.
ROC Analysis
Notes
Output Created		25-NOV-2022 04:59:43
Comments
Input	Data	C:\Users\Amira Ali\Desktop\Desktop 2020 1 23\Special issues MDPI\DASS-21 COVID-19 May 2021\Community.sav
	Active Dataset	DataSet7
	Filter	<none>
	Weight	<none>
	Split File	<none>
	N of Rows in Working Data File	992
Missing Value Handling	Definition of Missing	User-defined missing values are treated as missing.
	Cases Used	Only cases with valid data for all analysis variables are used in computing any statistics.
Weight Handling		not applicable
Syntax		ROC ANALYSIS IES_Avoidance BY DASS_8Cate (2) /MISSING USERMISSING=EXCLUDE /CRITERIA CUTOFF=INCLUDE TESTPOS=LARGE DISTRIBUTION=FREE CI=95 /DESIGN PAIR=FALSE /PLOT CURVE=ROC(REFERENCE) MODELQUALITY=TRUE /PRINT SE=TRUE COORDINATES=ROC CLASSIFIER=TRUE.
Resources	Processor Time	00:00:00.86
	Elapsed Time	00:00:00.86
Warnings
The test result variable(s): IES_Avoidance has at least one tie between the positive actual state group and the negative actual state group. Statistics may be biased.
Case Processing Summary
DASS_8 Categories 14 as a cutoff	Valid N (listwise)
Positivea	92
Negative	900
Missing	0
Total	992
Larger values of the test result variable(s) indicate stronger evidence for a positive actual state.
a. The positive actual state is 14 and above.
Area Under the ROC Curve
Test Result Variable(s):	IES_Avoidance
Area	Std. Errora	Asymptotic Sig.b	Asymptotic 95% Confidence Interval
			Lower Bound	Upper Bound
0.769342	0.0241566	0	0.721996	0.816688
The test result variable(s): IES_Avoidance has at least one tie between the positive actual state group and the negative actual state group. Statistics may be biased.
a. Under the nonparametric assumption
b. Null hypothesis: true area = 0.5
Classifier Evaluation Metrics
Test Result Variable(s):	IES_Avoidance
Gini Index	K-S Statistics
	Max K-Sa	Cutoffb
0.538684	0.400338	8.5
a. The maximum Kolmogorov-Smirnov (K-S) metric.
b. In case of multiple cutoff values associated with Max K-S, the largest one is reported.
Coordinates of the ROC Curve
Test Result Variable(s):	IES_Avoidance
Positive if Greater Than or Equal Toa	Sensitivity	1 - Specificity
-1	1	1
0.5	0.98913	0.788889
1.5	0.967391	0.716667
2.5	0.956522	0.672222
3.5	0.913043	0.605556
4.5	0.891304	0.545556
5.5	0.847826	0.49
6.5	0.771739	0.421111
7.5	0.75	0.358889
8.5	0.684783	0.284444
9.5	0.608696	0.226667
10.5	0.521739	0.175556
11.5	0.456522	0.123333
12.5	0.347826	0.0866667
13.5	0.23913	0.0544444
14.5	0.195652	0.03
15.5	0.141304	0.0188889
16.5	0.0978261	0.0122222
17.5	0.076087	0.00777778
18.5	0.0543478	0.00444444
19.5	0	0.00111111
21	0	0
The test result variable(s): IES_Avoidance has at least one tie between the positive actual state group and the negative actual state group.
a. The smallest cutoff value is the minimum observed test value minus 1, and the largest cutoff value is the maximum observed test value plus 1. All the other cutoff values are the averages of two consecutive ordered observed test values.
ROC Analysis
Notes
Output Created		25-NOV-2022 04:59:44
Comments
Input	Data	C:\Users\Amira Ali\Desktop\Desktop 2020 1 23\Special issues MDPI\DASS-21 COVID-19 May 2021\Community.sav
	Active Dataset	DataSet7
	Filter	<none>
	Weight	<none>
	Split File	<none>
	N of Rows in Working Data File	992
Missing Value Handling	Definition of Missing	User-defined missing values are treated as missing.
	Cases Used	Only cases with valid data for all analysis variables are used in computing any statistics.
Weight Handling		not applicable
Syntax		ROC ANALYSIS IES_Intrusion BY DASS_8Cate (2) /MISSING USERMISSING=EXCLUDE /CRITERIA CUTOFF=INCLUDE TESTPOS=LARGE DISTRIBUTION=FREE CI=95 /DESIGN PAIR=FALSE /PLOT CURVE=ROC(REFERENCE) MODELQUALITY=TRUE /PRINT SE=TRUE COORDINATES=ROC CLASSIFIER=TRUE.
Resources	Processor Time	00:00:01.31
	Elapsed Time	00:00:00.67
Warnings
The test result variable(s): IES_Intrusion has at least one tie between the positive actual state group and the negative actual state group. Statistics may be biased.
Case Processing Summary
DASS_8 Categories 14 as a cutoff	Valid N (listwise)
Positivea	92
Negative	900
Missing	0
Total	992
Larger values of the test result variable(s) indicate stronger evidence for a positive actual state.
a. The positive actual state is 14 and above.
Area Under the ROC Curve
Test Result Variable(s):	IES_Intrusion
Area	Std. Errora	Asymptotic Sig.b	Asymptotic 95% Confidence Interval
			Lower Bound	Upper Bound
0.853315	0.0205276	0	0.813082	0.893549
The test result variable(s): IES_Intrusion has at least one tie between the positive actual state group and the negative actual state group. Statistics may be biased.
a. Under the nonparametric assumption
b. Null hypothesis: true area = 0.5
Classifier Evaluation Metrics
Test Result Variable(s):	IES_Intrusion
Gini Index	K-S Statistics
	Max K-Sa	Cutoffb
0.70663	0.599807	5.5
a. The maximum Kolmogorov-Smirnov (K-S) metric.
b. In case of multiple cutoff values associated with Max K-S, the largest one is reported.
Coordinates of the ROC Curve
Test Result Variable(s):	IES_Intrusion
Positive if Greater Than or Equal Toa	Sensitivity	1 - Specificity
-1	1	1
0.5	0.978261	0.742222
1.5	0.956522	0.648889
2.5	0.945652	0.53
3.5	0.913043	0.433333
4.5	0.880435	0.336667
5.5	0.858696	0.258889
6.5	0.75	0.196667
7.5	0.652174	0.14
8.5	0.521739	0.0977778
9.5	0.445652	0.0655556
10.5	0.402174	0.0433333
11.5	0.336957	0.0288889
12.5	0.228261	0.0144444
13.5	0.0978261	0.00555556
14.5	0.0543478	0.00111111
15.5	0.0326087	0
16.5	0.0217391	0
17.5	0.0108696	0
19	0	0
The test result variable(s): IES_Intrusion has at least one tie between the positive actual state group and the negative actual state group.
a. The smallest cutoff value is the minimum observed test value minus 1, and the largest cutoff value is the maximum observed test value plus 1. All the other cutoff values are the averages of two consecutive ordered observed test values.
ROC Analysis
Notes
Output Created		25-NOV-2022 04:59:45
Comments
Input	Data	C:\Users\Amira Ali\Desktop\Desktop 2020 1 23\Special issues MDPI\DASS-21 COVID-19 May 2021\Community.sav
	Active Dataset	DataSet7
	Filter	<none>
	Weight	<none>
	Split File	<none>
	N of Rows in Working Data File	992
Missing Value Handling	Definition of Missing	User-defined missing values are treated as missing.
	Cases Used	Only cases with valid data for all analysis variables are used in computing any statistics.
Weight Handling		not applicable
Syntax		ROC ANALYSIS IES_Numbing BY DASS_8Cate (2) /MISSING USERMISSING=EXCLUDE /CRITERIA CUTOFF=INCLUDE TESTPOS=LARGE DISTRIBUTION=FREE CI=95 /DESIGN PAIR=FALSE /PLOT CURVE=ROC(REFERENCE) MODELQUALITY=TRUE /PRINT SE=TRUE COORDINATES=ROC CLASSIFIER=TRUE.
Resources	Processor Time	00:00:01.83
	Elapsed Time	00:00:00.81
Warnings
The test result variable(s): IES_Numbing has at least one tie between the positive actual state group and the negative actual state group. Statistics may be biased.
Case Processing Summary
DASS_8 Categories 14 as a cutoff	Valid N (listwise)
Positivea	92
Negative	900
Missing	0
Total	992
Larger values of the test result variable(s) indicate stronger evidence for a positive actual state.
a. The positive actual state is 14 and above.
Area Under the ROC Curve
Test Result Variable(s):	IES_Numbing
Area	Std. Errora	Asymptotic Sig.b	Asymptotic 95% Confidence Interval
			Lower Bound	Upper Bound
0.801854	0.0227877	0	0.757191	0.846517
The test result variable(s): IES_Numbing has at least one tie between the positive actual state group and the negative actual state group. Statistics may be biased.
a. Under the nonparametric assumption
b. Null hypothesis: true area = 0.5
Classifier Evaluation Metrics
Test Result Variable(s):	IES_Numbing
Gini Index	K-S Statistics
	Max K-Sa	Cutoffb
0.603708	0.464541	5.5
a. The maximum Kolmogorov-Smirnov (K-S) metric.
b. In case of multiple cutoff values associated with Max K-S, the largest one is reported.
Coordinates of the ROC Curve
Test Result Variable(s):	IES_Numbing
Positive if Greater Than or Equal Toa	Sensitivity	1 - Specificity
-1	1	1
0.5	0.978261	0.72
1.5	0.945652	0.622222
2.5	0.891304	0.507778
3.5	0.836957	0.403333
4.5	0.76087	0.303333
5.5	0.695652	0.231111
6.5	0.576087	0.146667
7.5	0.369565	0.0844444
8.5	0.271739	0.0433333
9.5	0.184783	0.0233333
10.5	0.0978261	0.0133333
11.5	0.076087	0.00777778
12.5	0.0326087	0.00666667
13.5	0.0217391	0.00111111
14.5	0.0108696	0.00111111
15.5	0.0108696	0
17	0	0
The test result variable(s): IES_Numbing has at least one tie between the positive actual state group and the negative actual state group.
a. The smallest cutoff value is the minimum observed test value minus 1, and the largest cutoff value is the maximum observed test value plus 1. All the other cutoff values are the averages of two consecutive ordered observed test values.
ROC Analysis
Notes
Output Created		25-NOV-2022 04:59:45
Comments
Input	Data	C:\Users\Amira Ali\Desktop\Desktop 2020 1 23\Special issues MDPI\DASS-21 COVID-19 May 2021\Community.sav
	Active Dataset	DataSet7
	Filter	<none>
	Weight	<none>
	Split File	<none>
	N of Rows in Working Data File	992
Missing Value Handling	Definition of Missing	User-defined missing values are treated as missing.
	Cases Used	Only cases with valid data for all analysis variables are used in computing any statistics.
Weight Handling		not applicable
Syntax		ROC ANALYSIS IES_Hyperarousal BY DASS_8Cate (2) /MISSING USERMISSING=EXCLUDE /CRITERIA CUTOFF=INCLUDE TESTPOS=LARGE DISTRIBUTION=FREE CI=95 /DESIGN PAIR=FALSE /PLOT CURVE=ROC(REFERENCE) MODELQUALITY=TRUE /PRINT SE=TRUE COORDINATES=ROC CLASSIFIER=TRUE.
Resources	Processor Time	00:00:01.42
	Elapsed Time	00:00:00.75
Warnings
The test result variable(s): IES_Hyperarousal has at least one tie between the positive actual state group and the negative actual state group. Statistics may be biased.
Case Processing Summary
DASS_8 Categories 14 as a cutoff	Valid N (listwise)
Positivea	92
Negative	900
Missing	0
Total	992
Larger values of the test result variable(s) indicate stronger evidence for a positive actual state.
a. The positive actual state is 14 and above.
Area Under the ROC Curve
Test Result Variable(s):	IES_Hyperarousal
Area	Std. Errora	Asymptotic Sig.b	Asymptotic 95% Confidence Interval
			Lower Bound	Upper Bound
0.875441	0.0209786	0	0.834323	0.916558
The test result variable(s): IES_Hyperarousal has at least one tie between the positive actual state group and the negative actual state group. Statistics may be biased.
a. Under the nonparametric assumption
b. Null hypothesis: true area = 0.5
Classifier Evaluation Metrics
Test Result Variable(s):	IES_Hyperarousal
Gini Index	K-S Statistics
	Max K-Sa	Cutoffb
0.750882	0.634976	4.5
a. The maximum Kolmogorov-Smirnov (K-S) metric.
b. In case of multiple cutoff values associated with Max K-S, the largest one is reported.
Coordinates of the ROC Curve
Test Result Variable(s):	IES_Hyperarousal
Positive if Greater Than or Equal Toa	Sensitivity	1 - Specificity
-1	1	1
0.5	0.967391	0.671111
1.5	0.923913	0.542222
2.5	0.913043	0.405556
3.5	0.869565	0.281111
4.5	0.826087	0.191111
5.5	0.75	0.138889
6.5	0.641304	0.0888889
7.5	0.532609	0.0544444
8.5	0.434783	0.0266667
9.5	0.347826	0.02
10.5	0.26087	0.00888889
11.5	0.163043	0.00222222
12.5	0.0978261	0
13.5	0.0217391	0
15	0	0
The test result variable(s): IES_Hyperarousal has at least one tie between the positive actual state group and the negative actual state group.
a. The smallest cutoff value is the minimum observed test value minus 1, and the largest cutoff value is the maximum observed test value plus 1. All the other cutoff values are the averages of two consecutive ordered observed test values.
ROC Analysis
Notes
Output Created		25-NOV-2022 04:59:46
Comments
Input	Data	C:\Users\Amira Ali\Desktop\Desktop 2020 1 23\Special issues MDPI\DASS-21 COVID-19 May 2021\Community.sav
	Active Dataset	DataSet7
	Filter	<none>
	Weight	<none>
	Split File	<none>
	N of Rows in Working Data File	992
Missing Value Handling	Definition of Missing	User-defined missing values are treated as missing.
	Cases Used	Only cases with valid data for all analysis variables are used in computing any statistics.
Weight Handling		not applicable
Syntax		ROC ANALYSIS IES_Sleep BY DASS_8Cate (2) /MISSING USERMISSING=EXCLUDE /CRITERIA CUTOFF=INCLUDE TESTPOS=LARGE DISTRIBUTION=FREE CI=95 /DESIGN PAIR=FALSE /PLOT CURVE=ROC(REFERENCE) MODELQUALITY=TRUE /PRINT SE=TRUE COORDINATES=ROC CLASSIFIER=TRUE.
Resources	Processor Time	00:00:01.44
	Elapsed Time	00:00:00.77
Warnings
The test result variable(s): IES_Sleep has at least one tie between the positive actual state group and the negative actual state group. Statistics may be biased.
Case Processing Summary
DASS_8 Categories 14 as a cutoff	Valid N (listwise)
Positivea	92
Negative	900
Missing	0
Total	992
Larger values of the test result variable(s) indicate stronger evidence for a positive actual state.
a. The positive actual state is 14 and above.
Area Under the ROC Curve
Test Result Variable(s):	IES_Sleep
Area	Std. Errora	Asymptotic Sig.b	Asymptotic 95% Confidence Interval
			Lower Bound	Upper Bound
0.837687	0.023463	0	0.791701	0.883674
The test result variable(s): IES_Sleep has at least one tie between the positive actual state group and the negative actual state group. Statistics may be biased.
a. Under the nonparametric assumption
b. Null hypothesis: true area = 0.5
Classifier Evaluation Metrics
Test Result Variable(s):	IES_Sleep
Gini Index	K-S Statistics
	Max K-Sa	Cutoffb
0.675374	0.544058	2.5
a. The maximum Kolmogorov-Smirnov (K-S) metric.
b. In case of multiple cutoff values associated with Max K-S, the largest one is reported.
Coordinates of the ROC Curve
Test Result Variable(s):	IES_Sleep
Positive if Greater Than or Equal Toa	Sensitivity	1 - Specificity
-1	1	1
0.5	0.902174	0.431111
1.5	0.815217	0.292222
2.5	0.717391	0.173333
3.5	0.608696	0.118889
4.5	0.423913	0.0444444
5.5	0.271739	0.0211111
6.5	0.119565	0.00444444
7.5	0.0652174	0.00111111
9	0	0
The test result variable(s): IES_Sleep has at least one tie between the positive actual state group and the negative actual state group.
a. The smallest cutoff value is the minimum observed test value minus 1, and the largest cutoff value is the maximum observed test value plus 1. All the other cutoff values are the averages of two consecutive ordered observed test values.
ROC Analysis
Notes
Output Created		25-NOV-2022 04:59:47
Comments
Input	Data	C:\Users\Amira Ali\Desktop\Desktop 2020 1 23\Special issues MDPI\DASS-21 COVID-19 May 2021\Community.sav
	Active Dataset	DataSet7
	Filter	<none>
	Weight	<none>
	Split File	<none>
	N of Rows in Working Data File	992
Missing Value Handling	Definition of Missing	User-defined missing values are treated as missing.
	Cases Used	Only cases with valid data for all analysis variables are used in computing any statistics.
Weight Handling		not applicable
Syntax		ROC ANALYSIS IES_Irritability BY DASS_8Cate (2) /MISSING USERMISSING=EXCLUDE /CRITERIA CUTOFF=INCLUDE TESTPOS=LARGE DISTRIBUTION=FREE CI=95 /DESIGN PAIR=FALSE /PLOT CURVE=ROC(REFERENCE) MODELQUALITY=TRUE /PRINT SE=TRUE COORDINATES=ROC CLASSIFIER=TRUE.
Resources	Processor Time	00:00:01.44
	Elapsed Time	00:00:00.63
Warnings
The test result variable(s): IES_Irritability has at least one tie between the positive actual state group and the negative actual state group. Statistics may be biased.
Case Processing Summary
DASS_8 Categories 14 as a cutoff	Valid N (listwise)
Positivea	92
Negative	900
Missing	0
Total	992
Larger values of the test result variable(s) indicate stronger evidence for a positive actual state.
a. The positive actual state is 14 and above.
Area Under the ROC Curve
Test Result Variable(s):	IES_Irritability
Area	Std. Errora	Asymptotic Sig.b	Asymptotic 95% Confidence Interval
			Lower Bound	Upper Bound
0.874928	0.0187703	0	0.838138	0.911717
The test result variable(s): IES_Irritability has at least one tie between the positive actual state group and the negative actual state group. Statistics may be biased.
a. Under the nonparametric assumption
b. Null hypothesis: true area = 0.5
Classifier Evaluation Metrics
Test Result Variable(s):	IES_Irritability
Gini Index	K-S Statistics
	Max K-Sa	Cutoffb
0.749855	0.600628	3.5
a. The maximum Kolmogorov-Smirnov (K-S) metric.
b. In case of multiple cutoff values associated with Max K-S, the largest one is reported.
Coordinates of the ROC Curve
Test Result Variable(s):	IES_Irritability
Positive if Greater Than or Equal Toa	Sensitivity	1 - Specificity
-1	1	1
0.5	0.956522	0.465556
1.5	0.934783	0.383333
2.5	0.836957	0.242222
3.5	0.771739	0.171111
4.5	0.532609	0.06
5.5	0.423913	0.0322222
6.5	0.173913	0.0155556
7.5	0.119565	0.01
9	0	0
The test result variable(s): IES_Irritability has at least one tie between the positive actual state group and the negative actual state group.
a. The smallest cutoff value is the minimum observed test value minus 1, and the largest cutoff value is the maximum observed test value plus 1. All the other cutoff values are the averages of two consecutive ordered observed test values.
ROC Analysis
Notes
Output Created		11-DEC-2022 03:13:52
Comments
Input	Data	C:\Users\Amira Ali\Desktop\Desktop 2020 1 23\Special issues MDPI\DASS-21 COVID-19 May 2021\Community.sav
	Active Dataset	DataSet2
	Filter	<none>
	Weight	<none>
	Split File	<none>
	N of Rows in Working Data File	992
Missing Value Handling	Definition of Missing	User-defined missing values are treated as missing.
	Cases Used	Only cases with valid data for all analysis variables are used in computing any statistics.
Weight Handling		not applicable
Syntax		ROC ANALYSIS TotIESR IES_Avoidance IES_Intrusion IES_Numbing IES_Hyperarousal IES_Sleep IES_Irritability BY DASS_8Cate (2) /MISSING USERMISSING=EXCLUDE /CRITERIA CUTOFF=INCLUDE TESTPOS=LARGE DISTRIBUTION=FREE CI=95 /DESIGN PAIR=FALSE /PLOT CURVE=ROC(REFERENCE) MODELQUALITY=TRUE /PRINT SE=TRUE COORDINATES=ROC PR CLASSIFIER=TRUE.
Resources	Processor Time	00:00:03.41
	Elapsed Time	00:00:01.58
Warnings
The test result variable(s): TotIESR, IES_Avoidance, IES_Intrusion, IES_Numbing, IES_Hyperarousal, IES_Sleep, IES_Irritability has at least one tie between the positive actual state group and the negative actual state group. Statistics may be biased.
Case Processing Summary
DASS_8 Categories 14 as a cutoff	Valid N (listwise)
Positivea	92
Negative	900
Missing	0
Total	992
Larger values of the test result variable(s) indicate stronger evidence for a positive actual state.
a. The positive actual state is 14 and above.
Area Under the ROC Curve
Test Result Variable(s)	Area	Std. Errora	Asymptotic Sig.b	Asymptotic 95% Confidence Interval
				Lower Bound	Upper Bound
TotIESR	0.905707	0.0177119	0	0.870992	0.940421
IES_Avoidance	0.769342	0.0241566	0	0.721996	0.816688
IES_Intrusion	0.853315	0.0205276	0	0.813082	0.893549
IES_Numbing	0.801854	0.0227877	0	0.757191	0.846517
IES_Hyperarousal	0.875441	0.0209786	0	0.834323	0.916558
IES_Sleep	0.837687	0.023463	0	0.791701	0.883674
IES_Irritability	0.874928	0.0187703	0	0.838138	0.911717
The test result variable(s): TotIESR, IES_Avoidance, IES_Intrusion, IES_Numbing, IES_Hyperarousal, IES_Sleep, IES_Irritability has at least one tie between the positive actual state group and the negative actual state group. Statistics may be biased.
a. Under the nonparametric assumption
b. Null hypothesis: true area = 0.5
Classifier Evaluation Metrics
Test Result Variable(s)	Gini Index	K-S Statistics
		Max K-Sa	Cutoffb
TotIESR	0.811413	0.699565	30.5
IES_Avoidance	0.538684	0.400338	8.5
IES_Intrusion	0.70663	0.599807	5.5
IES_Numbing	0.603708	0.464541	5.5
IES_Hyperarousal	0.750882	0.634976	4.5
IES_Sleep	0.675374	0.544058	2.5
IES_Irritability	0.749855	0.600628	3.5
a. The maximum Kolmogorov-Smirnov (K-S) metric.
b. In case of multiple cutoff values associated with Max K-S, the largest one is reported.
Coordinates of the ROC Curve
Test Result Variable(s)	Positive if Greater Than or Equal Toa	Sensitivity	1 - Specificity
TotIESR	-1	1	1
	0.5	1	0.896667
	1.5	1	0.874444
	2.5	1	0.836667
	3.5	1	0.806667
	4.5	1	0.787778
	5.5	1	0.771111
	6.5	0.98913	0.745556
	7.5	0.98913	0.72
	8.5	0.978261	0.687778
	9.5	0.978261	0.664444
	10.5	0.978261	0.631111
	11.5	0.978261	0.613333
	12.5	0.967391	0.591111
	13.5	0.956522	0.562222
	14.5	0.945652	0.536667
	15.5	0.945652	0.52
	16.5	0.945652	0.492222
	17.5	0.934783	0.458889
	18.5	0.923913	0.438889
	19.5	0.902174	0.416667
	20.5	0.902174	0.394444
	21.5	0.902174	0.366667
	22.5	0.902174	0.347778
	23.5	0.902174	0.317778
	24.5	0.902174	0.287778
	25.5	0.891304	0.26
	26.5	0.891304	0.238889
	27.5	0.880435	0.217778
	28.5	0.880435	0.198889
	29.5	0.880435	0.185556
	30.5	0.869565	0.17
	31.5	0.826087	0.155556
	32.5	0.815217	0.141111
	33.5	0.793478	0.13
	34.5	0.782609	0.115556
	35.5	0.771739	0.1
	36.5	0.73913	0.0922222
	37.5	0.717391	0.08
	38.5	0.673913	0.0633333
	39.5	0.619565	0.0566667
	40.5	0.586957	0.05
	41.5	0.554348	0.04
	42.5	0.532609	0.0333333
	43.5	0.51087	0.0244444
	44.5	0.456522	0.02
	45.5	0.423913	0.0122222
	46.5	0.402174	0.00777778
	47.5	0.347826	0.00555556
	48.5	0.326087	0.00444444
	49.5	0.326087	0.00333333
	50.5	0.282609	0.00333333
	51.5	0.25	0.00333333
	52.5	0.23913	0.00111111
	53.5	0.206522	0
	54.5	0.173913	0
	55.5	0.163043	0
	56.5	0.152174	0
	58	0.141304	0
	60	0.108696	0
	61.5	0.0978261	0
	62.5	0.076087	0
	63.5	0.0543478	0
	65	0.0326087	0
	66.5	0.0217391	0
	70.5	0.0108696	0
	75	0	0
IES_Avoidance	-1	1	1
	0.5	0.98913	0.788889
	1.5	0.967391	0.716667
	2.5	0.956522	0.672222
	3.5	0.913043	0.605556
	4.5	0.891304	0.545556
	5.5	0.847826	0.49
	6.5	0.771739	0.421111
	7.5	0.75	0.358889
	8.5	0.684783	0.284444
	9.5	0.608696	0.226667
	10.5	0.521739	0.175556
	11.5	0.456522	0.123333
	12.5	0.347826	0.0866667
	13.5	0.23913	0.0544444
	14.5	0.195652	0.03
	15.5	0.141304	0.0188889
	16.5	0.0978261	0.0122222
	17.5	0.076087	0.00777778
	18.5	0.0543478	0.00444444
	19.5	0	0.00111111
	21	0	0
IES_Intrusion	-1	1	1
	0.5	0.978261	0.742222
	1.5	0.956522	0.648889
	2.5	0.945652	0.53
	3.5	0.913043	0.433333
	4.5	0.880435	0.336667
	5.5	0.858696	0.258889
	6.5	0.75	0.196667
	7.5	0.652174	0.14
	8.5	0.521739	0.0977778
	9.5	0.445652	0.0655556
	10.5	0.402174	0.0433333
	11.5	0.336957	0.0288889
	12.5	0.228261	0.0144444
	13.5	0.0978261	0.00555556
	14.5	0.0543478	0.00111111
	15.5	0.0326087	0
	16.5	0.0217391	0
	17.5	0.0108696	0
	19	0	0
IES_Numbing	-1	1	1
	0.5	0.978261	0.72
	1.5	0.945652	0.622222
	2.5	0.891304	0.507778
	3.5	0.836957	0.403333
	4.5	0.76087	0.303333
	5.5	0.695652	0.231111
	6.5	0.576087	0.146667
	7.5	0.369565	0.0844444
	8.5	0.271739	0.0433333
	9.5	0.184783	0.0233333
	10.5	0.0978261	0.0133333
	11.5	0.076087	0.00777778
	12.5	0.0326087	0.00666667
	13.5	0.0217391	0.00111111
	14.5	0.0108696	0.00111111
	15.5	0.0108696	0
	17	0	0
IES_Hyperarousal	-1	1	1
	0.5	0.967391	0.671111
	1.5	0.923913	0.542222
	2.5	0.913043	0.405556
	3.5	0.869565	0.281111
	4.5	0.826087	0.191111
	5.5	0.75	0.138889
	6.5	0.641304	0.0888889
	7.5	0.532609	0.0544444
	8.5	0.434783	0.0266667
	9.5	0.347826	0.02
	10.5	0.26087	0.00888889
	11.5	0.163043	0.00222222
	12.5	0.0978261	0
	13.5	0.0217391	0
	15	0	0
IES_Sleep	-1	1	1
	0.5	0.902174	0.431111
	1.5	0.815217	0.292222
	2.5	0.717391	0.173333
	3.5	0.608696	0.118889
	4.5	0.423913	0.0444444
	5.5	0.271739	0.0211111
	6.5	0.119565	0.00444444
	7.5	0.0652174	0.00111111
	9	0	0
IES_Irritability	-1	1	1
	0.5	0.956522	0.465556
	1.5	0.934783	0.383333
	2.5	0.836957	0.242222
	3.5	0.771739	0.171111
	4.5	0.532609	0.06
	5.5	0.423913	0.0322222
	6.5	0.173913	0.0155556
	7.5	0.119565	0.01
	9	0	0
The test result variable(s): TotIESR, IES_Avoidance, IES_Intrusion, IES_Numbing, IES_Hyperarousal, IES_Sleep, IES_Irritability has at least one tie between the positive actual state group and the negative actual state group.
a. The smallest cutoff value is the minimum observed test value minus 1, and the largest cutoff value is the maximum observed test value plus 1. All the other cutoff values are the averages of two consecutive ordered observed test values.

## Sheet: Sheet5
Supplementary Figure 1: Path model Predicting the relationships among the six subscales of the IES-R in the clinical sample
Standardized Regression Weights: (Group number 1 - Default model)
			Estimate	S.E.	C.R.	P	Label
IES_Irritability	<---	IES_Intrusion	0.4	0.069	3.113	0.002
IES_Irritability	<---	IES_Hyperarousal	0.635	0.142	2.768	0.006
IES_Sleep	<---	IES_Hyperarousal	0.246	0.102	1.429	0.153
IES_Numbing	<---	IES_Intrusion	0.326	0.066	3.682	***
IES_Numbing	<---	IES_Hyperarousal	0.259	0.076	2.923	0.003
IES_Avoidance	<---	IES_Numbing	0.259	0.099	3.946	***
IES_Avoidance	<---	IES_Hyperarousal	0.31	0.099	4.021	***
IES_Avoidance	<---	IES_Intrusion	0.262	0.087	3.355	***
IES_Sleep	<---	IES_Irritability	0.657	0.259	2.433	0.015
IES_Irritability	<---	IES_Sleep	-0.486	0.43	-1.179	0.238
Supplementary Figure 2: Path model Predicting the relationships among the six subscales of the IES-R in the healthy adult sample
Standardized Regression Weights: (Group number 1 - Default model)
			Estimate	S.E.	C.R.	P	Label
IES_Numbing	<---	IES_Intrusion	0.389	0.03	10.813	***
IES_Numbing	<---	IES_Hyperarousal	0.24	0.036	6.67	***
IES_Irritability	<---	IES_Intrusion	0.265	0.036	4.057	***
IES_Irritability	<---	IES_Hyperarousal	0.493	0.067	5.024	***
IES_Sleep	<---	IES_Hyperarousal	0.245	0.049	2.972	0.003
IES_Sleep	<---	IES_Intrusion	0.147	0.029	2.498	0.012
IES_Irritability	<---	IES_Numbing	0.192	0.025	5.101	***
IES_Avoidance	<---	IES_Numbing	0.419	0.045	14.547	***
IES_Avoidance	<---	IES_Hyperarousal	0.22	0.052	6.59	***
IES_Avoidance	<---	IES_Intrusion	0.149	0.044	4.307	***
IES_Irritability	<---	IES_Sleep	-0.331	0.251	-1.491	0.136
IES_Sleep	<---	IES_Irritability	0.449	0.165	2.407	0.016
